# Supplementary material for: Effects of pamidronate disodium on the loss of osteoarthritic subchondral bone and the expression of cartilaginous and subchondral osteoprotegerin and RANKL in rabbits
Source: PubMed Central journal article supplement (PMC4240862; doi:10.1186/1471-2474-15-370), 2014-11-06

positive control  
OPG → RANKL

negative control

cartilage

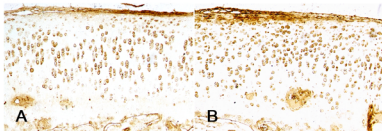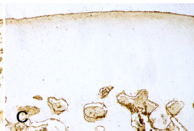

subchondral  
bone

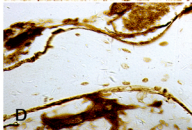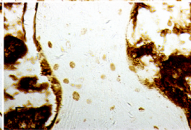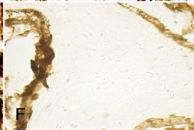

Supplement: 12891_2014_2308_MOESM1_ESM.pdf [file 12891_2014_2308_MOESM1_ESM.pdf]
